# Supplementary material for: Ethnic differences in the use of prescription drugs: a cross-sectional analysis of linked survey and administrative data
Source: PubMed Central journal article supplement — Open Med. 2011 May 17;5(2):e87–92. (PMC3148005), 2011-05-17
Supplement: OpenMed-05-e87-s003.pdf [file OpenMed-05-e87-s003.pdf]

**Appendix C: Ethnic groups derived from the Canadian Community Health Survey (CCHS) data**

| Ethnic group listed in CCHS questionnaire                           | Ethnic group used in present study | No. of respondents included in present study |
|---------------------------------------------------------------------|------------------------------------|----------------------------------------------|
| White                                                               | White                              | 16 260                                       |
| Chinese                                                             | Chinese                            | 1 308                                        |
| South Asian (e.g., East Indian, Pakistani, Sri Lankan)              | South Asian                        | 527                                          |
| Filipino                                                            | Other Asian                        | 222                                          |
| South East Asian (e.g., Cambodian, Indonesian, Laotian, Vietnamese) |                                    | 126                                          |
| Japanese                                                            |                                    | 129                                          |
| Korean                                                              |                                    | 101                                          |
| Black                                                               | Non-Asian, non-white               | 49                                           |
| Latin American                                                      |                                    | 68                                           |
| Arab                                                                |                                    | 22                                           |
| West Asian (e.g., Afghan, Iranian)                                  |                                    | 72                                           |
| Other                                                               |                                    | 214                                          |
| More than one of the above ethnicities                              |                                    | Mixed                                        |
